# Supplementary material for: Rescue Therapy after Failure of HCV Antiviral Treatment with Interferon-Free Regimens
Source: MDPI journal article supplement (doi:10.3390/v15030677), 2023-03-04
Supplement: s1 [file s1]

Table S1 Suppl. Reference values of laboratory parameters.

| Laboratory parameters      | Reference values | Unit          |
|----------------------------|------------------|---------------|
| ALT (Alanine transaminase) | <40              | IU/l          |
| Bilirubin                  | 0,3–1,2          | mg/dl         |
| Albumin                    | 3,5–5            | g/dl          |
| Creatinine                 | 0,6–1,3          | mg/dl         |
| Hemoglobin                 | 13–18            | g/dl          |
| Platelets                  | 100–400          | 1000/ $\mu$ l |
